Urol Int 2022;106:537  
DOI: 10.1159/000522162

Published online: January 28, 2022

In the article “Percutaneous Nephrolithotomy in Patients with Chronic Kidney Disease: A Systematic Review” [Urol Int. 2022, DOI: 10.1159/000520266] by Mehra et al., the 2nd author’s name and affiliation should correctly read “Parmeshwar Satpathy,” “Department of Community Medicine, Dr. B.C. Roy Multi-Speciality Medical Research Centre, IIT Kharagpur, Kharagpur, India.”
